# Supplementary material
Source: publisher figshare collection journal article supplement (https://frontiersin.figshare.com/ndownloader/files/12543134)
Supplement: Supplementary file [file 12543134]

## Supplementary Material

### Propagule pressure build-up by the invasive *Hymenoscyphus fraxineus* following its introduction to an ash forest inhabited by the native *Hymenoscyphus albidus*

Ari M. Hietala\*, Isabella Børja, Halvor Solheim, Nina E. Nagy, Volkmar Timmermann

\* Correspondence: Ari M. Hietala ari.hietala@nibio.no

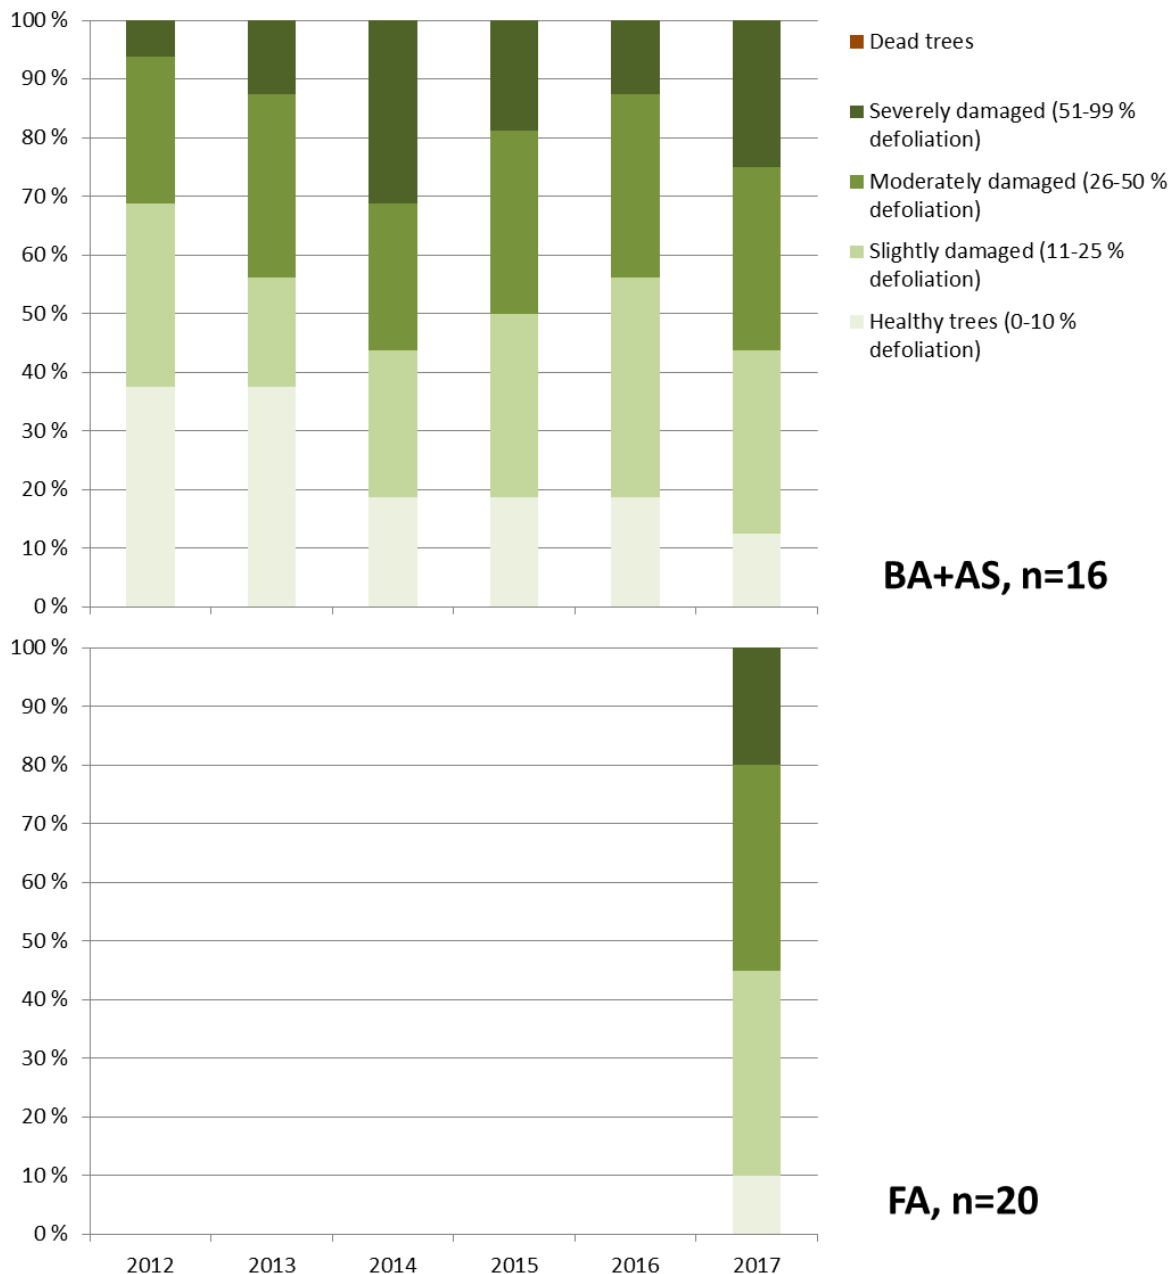

**Supplementary Figure 1.** Percentage of dominant ash trees (DBH>125 mm) in different damage classes. Upper panel: Monitoring plots Baustad (BA) and Askvik (AS) in Western Norway, damage assessments 2012–2017. Lower panel: Experimental stand in Fana, Bergen (FA), damage assessment 2017.
